# Supplementary material
Source: PubMed Central journal article supplement (PMC7260017)
Supplement: jci-130-133215-s100.pdf [file jci-130-133215-s100.pdf]

Figure S1

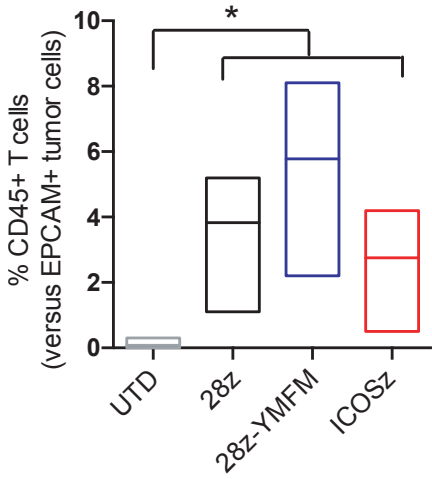

**Supplementary Figure 1. T cell infiltration in tumors from NSG animals treated with SS1-CART.** NSG mice bearing s.c. Capan-2 tumors were treated with a single dose of CAR-T cells administered intravenously. Tumors were obtained at day 7 after treatment. The percentage of live human CD45<sup>+</sup> T cells infiltrating the tumor versus EPCAM<sup>+</sup> live tumor cells was analyzed by flow cytometry. \*P < 0.05 by one-way ANOVA with Tukey post hoc test.

**Figure S2**

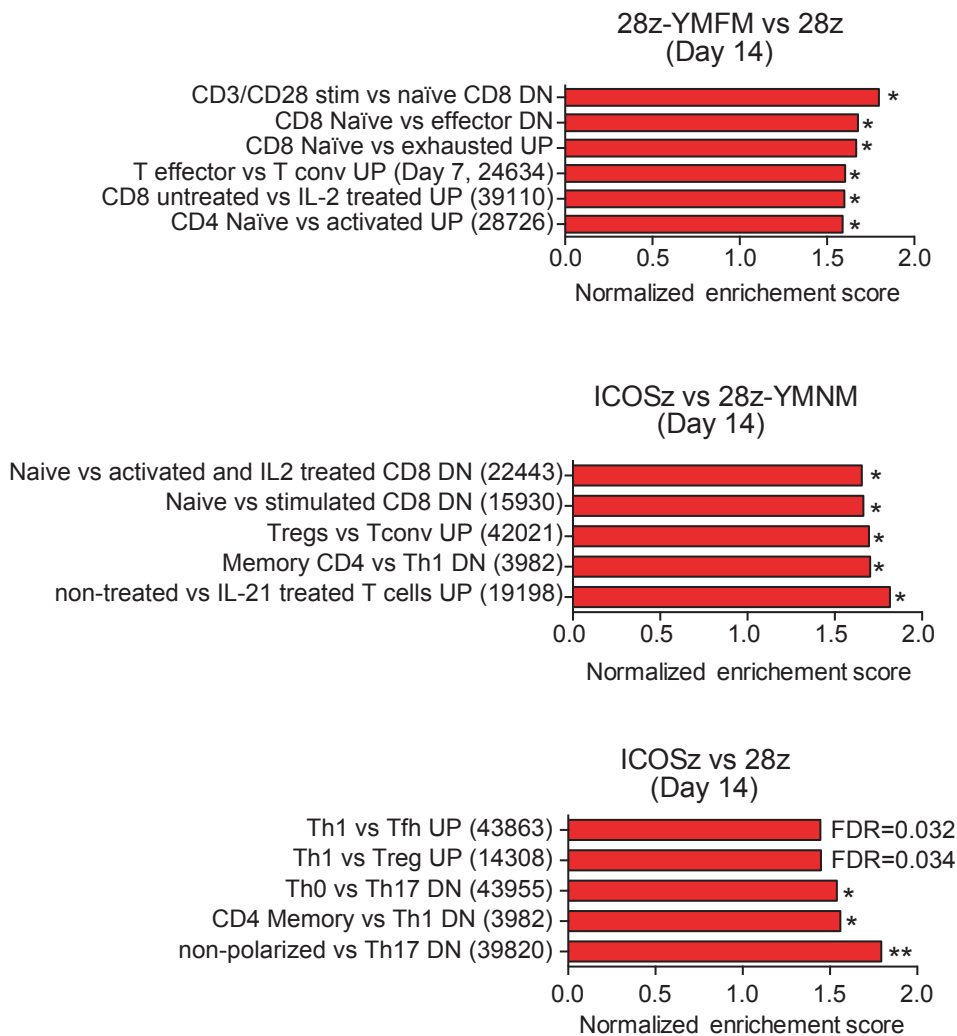

**Supplementary Figure 2. Long-term signaling through 28z-YMFM CAR delays T cell differentiation and exhaustion and drives Th17 polarization.** NSG mice bearing s.c. Capan-2 tumors were treated with CAR-T cells. T cells were isolated from tumors at day 14 after treatment and were subjected to RNA-seq sample preparation and sequencing. Data shows normalized enrichment score of selected up- or down-regulated gene sets associated with T cell differentiation or Th17 polarization as determined by GSEA using MSigDR C7 gene ontology sets. For all pathways, the false discovery rate (FDR)  $q \leq 0.02$ . GSE datasets are indicated in parentheses.
